# Highly Predictive Transdiagnostic Features Shared across Schizophrenia, Bipolar Disorder, and ADHD Identified Using a Machine Learning Based Approach

1 Yuelu Liu<sup>1</sup>, Monika S. Mellem<sup>1</sup>, Humberto Gonzalez<sup>1</sup>, Matthew Kollada<sup>1</sup>, Atul R.  
2 Mahableshwarkar<sup>1</sup>, Annette Madrid<sup>1</sup>, William J. Martin<sup>1</sup>, Parvez Ahammad<sup>1\*</sup>

3 <sup>1</sup>Blackthorn Therapeutics, Inc., San Francisco, CA, USA

4 \* Correspondence:

5 Parvez Ahammad, PhD

6 parvez.ahammad@blackthornrx.com

7 **Keywords:** transdiagnostic, schizophrenia, bipolar disorder, ADHD, machine learning.

## 8 Abstract

9 The Diagnostic and Statistical Manual of Mental Disorders (DSM) is the standard for diagnosing  
10 psychiatric disorders in the United States. However, evidence has suggested that symptoms in  
11 psychiatric disorders are not restricted to the boundaries between DSM categories, implying an  
12 underlying latent transdiagnostic structure of psychopathology. Here, we applied an importance-  
13 guided machine learning technique for model selection to item-level data from self-reported  
14 instruments contained within the Consortium for Neuropsychiatric Phenomics dataset. From 578  
15 questionnaire items, we identified a set of features which consisted of 85 items that were shared  
16 across diagnoses of schizophrenia (SCZ), bipolar disorder (BD), and attention deficit/hyperactivity  
17 disorder (ADHD). A classifier trained on the transdiagnostic features reliably distinguished the  
18 patient group as a whole from healthy controls (classification AUC = 0.95) and only 10 items were  
19 needed to attain the performance level of AUC being 0.90. A sum score created from the items  
20 produced high separability between patients and healthy controls (Cohen's  $d = 2.85$ ), and it  
21 outperformed predefined sum scores and sub-scores within the instruments (Cohen's  $d$  ranging  
22 between 0.13 and 1.21). The transdiagnostic features comprised both symptom domains (e.g.  
23 dysregulated mood, attention deficit, and anhedonia) and personality traits (e.g. neuroticism,  
24 impulsivity, and extraversion). Moreover, by comparing the features that were common across the  
25 three patient groups with those that were most predictive of a single patient category, we can describe  
26 the unique features for each patient group superimposed on the transdiagnostic feature structure.  
27 Overall, our results reveal a latent transdiagnostic symptom/behavioral phenotypic structure shared  
28 across SCZ, BD, and ADHD and present a new perspective to understand insights offered by self-  
29 report psychiatric instruments.

30 **Number of words:** 6463

31 **Number of words in abstract:** 267

32 **Number of figures:** 4

## 33 1 Introduction

34 The Diagnostic and Statistical Manual of Mental Disorders (DSM) provides a symptom-based  
35 taxonomy which serves to help clinicians classify various clusters of symptoms and abnormal  
36 behaviors into distinct categories of disorders. The uniformity of diagnostic criteria in DSM serves to  
37 effectively index psychiatric disorders but does not provide a data-driven framework within which to  
38 understand the shared and unique features across disorders. For example, dimensionality and  
39 comorbidity are pervasive in terms of symptoms across different DSM categories (Kessler et al.,  
40 2005; Markon, 2009; Krueger and Markon, 2011). Such dimensionality manifests as heterogeneity in  
41 symptom clusters within disease categories defined by the DSM and is exemplified across DSM  
42 categories (Kessler et al., 2007). In the area of anxiety and mood disorders, more than 50% of  
43 individuals are diagnosed as having more than a single category of disorders according to the DSM at  
44 a given time (Grisanzio et al., 2017). Similarly, about 50% of bipolar disorder patients exhibit  
45 schizophrenia-like psychotic symptoms during illness episodes (Coryell et al., 2001; Keck et al.,  
46 2003). The presence of such psychotic symptoms can be mood-incongruent (Pacheco et al., 2010)  
47 and can occur outside of illness episodes (Pope and Lipinski, 1978; Abrams and Taylor, 1981). These  
48 observations highlight the likelihood of a latent trans-diagnostic dimensional structure that spans  
49 multiple disorders (Krueger and Markon, 2006) and underscore the importance of understanding  
50 patients at the symptom-level, rather than simply at a diagnostic level, to create more effective  
51 treatments.

52 Studies have attempted to uncover the latent structure of psychopathology, between or within  
53 categories, through multimodal assessments that measure symptoms, behavior, physiology, imaging,  
54 and genetics. One such example is the large-scale study conducted by the UCLA Consortium for  
55 Neuropsychiatric Phenomics (CNP), which seeks to identify links among phenotypic data, imaging,  
56 and genetics (Poldrack et al., 2016). Overall, genetic studies have pointed to the heritability of major  
57 neuropsychiatric disorders (Cross-Disorder Group of the Psychiatric Genomics Consortium, 2013;  
58 Hamshere et al., 2013; Larsson et al., 2013; The Brainstorm Consortium et al., 2017; Bipolar  
59 Disorder and Schizophrenia Working Group of the Psychiatric Genomics Consortium et al., 2018;  
60 Gandal et al., 2018) as well as the genetic commonality amongst disorders (Purcell et al., 2009; Lotan  
61 et al., 2014) such as schizophrenia (SCZ), bipolar disorder (BD), and attention deficit/hyperactivity  
62 disorder (ADHD). Recent data-driven studies based on symptom and behavior have focused on  
63 classifying and subtyping patients within a single diagnostic category (Lamers et al., 2012; van Loo  
64 et al., 2012; Georgiades et al., 2013; Doshi-Velez et al., 2014; van Hulst et al., 2014; Costa Dias et  
65 al., 2015; Geisler et al., 2015; Sun et al., 2015; Drysdale et al., 2016; Gheiratmand et al., 2017).  
66 Several of these studies identified important shared abnormal features associated with the latent  
67 transdiagnostic structure across major psychiatric disorders.

68 Despite recent advancements, several unresolved issues still remain in the field. First, the clinical  
69 utility of using the features identified in the above-mentioned studies to reliably classify patients  
70 remains an open question. Emerging studies have used unsupervised machine learning approaches,  
71 such as clustering and dimensionality reduction algorithms, to uncover the transdiagnostic structure  
72 across disorders (Grisanzio et al., 2017; Xia et al., 2018). However, the lack of ground truth on how  
73 patients should be assigned to an identified cluster/subtype limits the application of these insights.  
74 Second, despite recent genetic studies documenting shared risk factors among SCZ, BD, and ADHD  
75 (Cross-Disorder Group of the Psychiatric Genomics Consortium, 2013; Larsson et al., 2013), a trans-  
76 diagnostic dimensional structure shared across the three disorders has not been discovered in other  
77 modalities such as neuroimaging and clinical characteristics. While a substantial body of  
78 neuroimaging studies have focused on investigating shared etiology between SCZ and BD (see e.g.,

79 Rashid et al., 2014), studies that further incorporated ADHD are scarce. Third, how well different  
80 feature modalities can be used as markers to reliably identify psychiatric patients in a clinical setting  
81 has not been systematically compared in prior literature. Studies typically reported systematic  
82 deviations within a single feature modality among psychiatric patients (Buckholtz and Meyer-  
83 Lindenberg, 2012; Goodkind et al., 2015; Sha et al., 2018) and the relative predictive power of  
84 various feature modalities in transdiagnostic scenarios remains unknown.

85 In the current study, we addressed the above issues by taking a patient-focused approach to identify  
86 transdiagnostic features that are shared across SCZ, BD, and ADHD. Following the definition used in  
87 the recent literature, we used the term “transdiagnostic” to denote features that extend beyond a  
88 single DSM category. Using an importance-guided model selection approach, the supervised  
89 machine learning framework used in this study allowed us to evaluate the performance of the  
90 transdiagnostic features and hence to iteratively identify the optimal set of features required to  
91 distinguish the patient group from healthy controls (HCs). Based on the CNP dataset, we used  
92 multiple data modalities including the behavioral/symptom phenotypes (from here on referred to as  
93 phenotypes) defined in self-reported instruments and neuroimaging data (sMRI and fMRI) to obtain  
94 the optimal transdiagnostic features. Because the self-reported instruments were administered to  
95 acquire a rich set of phenotypic information rather than providing diagnoses, our study also sought to  
96 establish the clinical utility of these phenotypic features in distinguishing patients from HCs. In  
97 addition, the clinical utility of the markers identified in each feature modality was systematically  
98 evaluated by comparing the performance of models trained on each modality. We then report these  
99 shared features and discuss the identified latent psychopathological structure across these psychiatric  
100 disorders.

101

## 102 **2 Materials and Methods**

### 103 **2.1 The CNP dataset**

104 We utilized the openly available dataset from the CNP LA5c Study conducted at the University of  
105 California, Los Angeles (the CNP dataset: <https://openneuro.org/datasets/ds000030/versions/00016>).  
106 Detailed information on the CNP study/dataset can be found in (Poldrack et al., 2016). The CNP  
107 dataset contains a variety of data modalities. In this study, we focused on identifying shared  
108 transdiagnostic features based on the item-level data from self-reported instruments and  
109 neuroimaging data (including both sMRI and resting-state fMRI). The dataset in this study includes  
110 272 subjects, of which 50 are diagnosed with schizophrenia (SCZ), 49 with bipolar disorder (BD),  
111 and 43 with attention deficit/hyperactivity disorder (ADHD). The remaining 130 subjects are age-  
112 matched healthy controls (HC). The diagnoses were given by following the Diagnostic and Statistical  
113 Manual of Mental Disorders, Fourth Edition, Text Revision (DSM-IV-TR; American Psychiatric  
114 Association, 2000) and were based on the Structured Clinical Interview for DSM-IV (First et al.,  
115 2002). To better characterize ADHD related symptoms, the Adult ADHD Interview (Kaufman et al.,  
116 2000) was further used as a supplement. Out of all subjects, 1 had incomplete phenotype data from  
117 the instruments used in this study, 10 had missing structural MRI (sMRI) data, and 10 had missing  
118 resting-state functional MRI (fMRI) data. Fifty-five (55) subjects had an aliasing artifact in their  
119 sMRI data potentially caused by the headset used in the scanner, whereas 22 subjects had errors in  
120 the structural-functional alignment step during MRI preprocessing. These subjects were excluded  
121 from the corresponding modeling analyses performed in this study. The final number of subjects  
122 included in each modeling analysis is as follows: phenotype data, 271; sMRI, 206; fMRI, 229;

123 sMRI+fMRI, 178; phenotype+sMRI, 205; phenotype+fMRI, 228; phenotype+sMRI+fMRI: 177. The  
124 demographic information from the subjects are given in **Table 1**.

## 125 **2.2 Phenotype data**

126 It should be noted that we used the term phenotype to broadly refer to behavioral and symptom  
127 measures characterized by the clinical instruments. A total of 20 clinical instruments were  
128 administered in the CNP dataset to capture a wide range of phenotype data including specific  
129 behavioral traits and symptom dimensions (Poldrack et al., 2016). These instruments are either  
130 clinician-rated or self-reported. While the clinician-rated questionnaires only covered relevant patient  
131 groups, 13 self-reported clinical scales were given to all three patient groups as well as the healthy  
132 controls. We therefore selected to only use subjects' answers to each of the individual questions  
133 coming from these 13 self-reported scales as input features to our models because these scales  
134 captured phenotypic features across all diagnostic groups as well as the HCs. It should be noted that  
135 these 13 self-reported scales were not used to provide the official diagnosis in the CNP data since  
136 they are not designed for such purposes. Specifically, the 13 self-reported scales used in this study  
137 are: Chapman Social Anhedonia Scale, Chapman Physical Anhedonia Scale, Chapman Perceptual  
138 Aberrations Scale, Hypomanic Personality Scale, Hopkins Symptom Checklist, Temperament and  
139 Character Inventory, Adult ADHD Self-Report Scale v1.1 Screener, Barratt Impulsiveness Scale,  
140 Dickman Functional and Dysfunctional Impulsivity Scale, Multidimensional Personality  
141 Questionnaire – Control Subscale, Eysenck's Impulsivity Inventory, Scale for Traits that Increase  
142 Risk for Bipolar II Disorder, and Golden and Meehl's Seven MMPI Items Selected by Taxonomic  
143 Method. Together, these self-reported scales cover domains including symptoms, personality traits,  
144 positive and negative affect, cognition, as well as sensory and social processing. The scores for  
145 known sum and sub-scores within these self-reported instruments for each patient group as well as  
146 the HCs are reported in **Supplementary Table 1**.

## 147 **2.3 MRI data acquisition parameters**

148 MRI data were acquired on one of two 3T Siemens Trio scanners both housed at the University of  
149 California, Los Angeles. The sMRI data used in this study are T1-weighted and were acquired using  
150 a magnetization-prepared rapid gradient-echo (MPRAGE) sequence with the following acquisition  
151 parameters: TR = 1.9 s, TE = 2.26 ms, FOV = 250 mm, matrix = 256 x 256, 176 1-mm thick slices  
152 oriented along the sagittal plane. The resting-state fMRI data contain a single run lasting 304 s. The  
153 scan was acquired using a T2\*-weighted echoplanar imaging (EPI) sequence using the following  
154 parameters: 34 oblique slices, slice thickness = 4 mm, TR = 2 s, TE = 30 ms, flip angle = 90°, matrix  
155 size 64 x 64, FOV = 192 mm. During the resting-state scan, subjects remained still and relaxed inside  
156 the scanner, and kept their eyes open. No specific stimulus or task was presented to them.

## 157 **2.4 MRI preprocessing**

### 158 **2.4.1 sMRI**

159 Structural MRI preprocessing was implemented using Freesurfer's *recon-all* processing pipeline  
160 (<http://surfer.nmr.mgh.harvard.edu/>). Briefly, the T1-weighted structural image from each subject  
161 was intensity normalized and skull-stripped. The subcortical structures, white matter, and ventricles  
162 were segmented and labeled according to the algorithm described in (Fischl et al., 2002). The pial  
163 and white matter surfaces were then extracted and tessellated (Fischl et al., 2001), and cortical  
164 parcellation was obtained on the surfaces according to a gyral-based anatomical atlas which partitions  
165 each hemisphere into 34 regions (Desikan et al., 2006).

## 166 2.4.2 Resting-state fMRI

167 Resting-state fMRI preprocessing was implemented in AFNI (<http://afni.nimh.nih.gov/afni>).  
168 Specifically, the first 3 volumes in the data were discarded to remove any transient magnetization  
169 effects in the data. Spikes in the resting-state fMRI data were then removed and all volumes were  
170 spatially registered with the 4<sup>th</sup> volume to correct for any head motion. The T1w structural image was  
171 deobliqued and uniformized to remove shading artifacts before skull-stripping. The skull-stripped  
172 structural image was then spatially registered with motion corrected fMRI data. The fMRI data were  
173 further spatially smoothed using a 6-mm FWHM Gaussian kernel and converted to percent signal  
174 change. Separately, the Freesurfer-generated aparc+aseg image from sMRI preprocessing was also  
175 spatially registered with and resampled to have the same spatial resolution of the BOLD image.  
176 Based on this, eroded white matter and ventricle masks were created, from which nuisance tissue  
177 regressors were built based on non-spatially smoothed fMRI data to model and remove variances that  
178 are not part of the BOLD signal. Specifically, we used the ANATICOR procedure (Jo et al., 2010),  
179 where a locally averaged signal from the eroded white matter mask within a 25-mm radius spherical  
180 region of interest (ROI) centered at each gray matter voxel was used to create a voxel-wise local  
181 estimate of the white matter nuisance signal. This local estimate of the white matter nuisance signal,  
182 along with the estimated head motions and average signal from the ventricles were detrended with a  
183 4<sup>th</sup> order polynomial and then regressed out from the fMRI data. Finally, the clean resting-state fMRI  
184 data was spatially normalized to the MNI template and resampled to have 2 mm isotropic voxels.  
185 Note that in our preprocessing pipeline, the spatial normalization was performed after regressing out  
186 nuisance signals. This allowed nuisance tissue regression to be performed in each subject's native  
187 space to achieve a more accurate removal of these signals.

## 188 2.5 Feature extraction

189 We extracted measures from 3 data modalities as features: phenotype data from self-reported  
190 instruments, measures derived from the sMRI data, and functional correlations based on resting-state  
191 fMRI data. For phenotype features from self-reported instruments, we directly used subjects'  
192 responses from a total of 578 questions from the above listed 13 instruments. Responses from non-  
193 True/False type questions were normalized to have a range of between 0 and 1 to match those from  
194 True/False type questions. For sMRI features, we specifically used 1) the volume of subcortical  
195 structures generated by Freesurfer's subcortical volumetric segmentation, and 2) the area, thickness,  
196 and volume of cortical brain regions estimated from Freesurfer's surface-based analysis pipeline. For  
197 resting-state fMRI features, we first parceled the brain into 264 regions according to the atlas  
198 proposed in (Power et al., 2011). A 5-mm radius spherical ROI was seeded according to the MNI  
199 coordinates of each brain region specified in the atlas. Second, the clean resting-state BOLD time  
200 series from all voxels within a given 5-mm radius spherical ROI were averaged to create the  
201 representative time series for the brain region. Third, functional connectivity between ROIs was  
202 estimated via the Pearson's correlation coefficient between the average time series from all pairs of  
203 brain regions. This produced a 264-by-264 correlation matrix, from which 34,716 are unique  
204 correlations between two distinct ROIs and were used as input features to the models.

## 205 2.6 Model fitting and feature importance weighting

206 The primary goals of machine learning analyses in this study were two-fold: 1) to identify important  
207 features shared across a transdiagnostic patient group and 2) to evaluate the clinical utility of the  
208 transdiagnostic features via classifiers that can reliably separate the patient group as a whole from  
209 healthy controls. To achieve these goals, we built classifiers based on the logistic regression model as  
210 implemented in the *scikit-learn* toolbox to classify patients from HCs. To identify predictive

211 transdiagnostic features embedded within each feature modality, separate logistic regression models  
212 were independently trained using each of the above extracted feature modalities (i.e., item-level  
213 phenotype data, sMRI measures, and resting-state fMRI correlations) as inputs and their  
214 performances were evaluated in each of the transdiagnostic scenarios. Combinations of 2 and 3  
215 feature modalities were also used as classifiers' inputs and their performances were evaluated in the  
216 same fashion.

217 Because the number of features we extracted was relatively large compared to the sample size in  
218 CNP data, an elastic net regularization term (Zou and Hastie, 2005) was added in all of our logistic  
219 regression models to prevent overfitting. The use of elastic net regularization in our models also  
220 enabled feature selection as the regularization induces sparse models via the grouping effect where  
221 all the important features will be retained and the unimportant ones set to zero (Zou and Hastie, 2005;  
222 Ryali et al., 2012). This allowed us to identify predictive features that are shared across multiple  
223 patient categories.

224 We adopted the following procedure to determine the best regularization parameters. First, the input  
225 data were randomly partitioned into a development set and an evaluation set. The development set  
226 contains 80% of the data upon which a grid search with 3-fold cross validation procedure was  
227 implemented to determine the best regularization parameters. Then the model with the best  
228 regularization parameters was further tested on the remaining 20% of evaluation set. All features  
229 were standardized to have zero mean and unit variance within the training data and the mean and  
230 variance from the training data were used to standardize the corresponding test data. The entire  
231 process was implemented 100 times. The following metrics were used to quantify the model  
232 performances: area under the receiver operating characteristics curve (AUC), accuracy, sensitivity,  
233 and specificity. The mean and standard deviation of the above metrics over the 100 evaluation sets  
234 were reported.

235 From the above models, the predictive power of each feature is assessed via the weights of the  
236 logistic regression model in our transdiagnostic classifiers. For each feature, we calculated its  
237 corresponding standardized model weight (mean model weight divided by the standard deviation)  
238 across the 100 model implementations as the proxy for feature importance. Features with large  
239 importance values from our transdiagnostic classifiers are potentially symptoms, traits, and  
240 neuropathological mechanisms shared across patient groups but are distinct from healthy controls.

241 To identify the set of most predictive transdiagnostic features within a given data modality, we used  
242 the following feature importance-guided sequential model selection procedure. Specifically, we first  
243 rank ordered the features in the classifiers according to their standardized model weights. Next, a  
244 series of truncated models was built such that each model only takes the top k most predictive  
245 features as inputs to perform the same classification tasks. The model weights and the best  
246 regularization parameters for each truncated model were estimated via the 3-fold cross validation  
247 procedure within the development set. We let k range from the top 1 most predictive feature to all  
248 available features in steps of 1 for phenotype features, sMRI features, and the combination of the two  
249 feature sets. For any feature or feature combinations involving fMRI correlations, because of the  
250 significantly increased feature dimension, the k's were chosen from a geometric sequence with a  
251 common ratio of 2 (i.e., 1, 2, 4, 8, 16, ...). The sequential model selection procedure was  
252 implemented 10 times for each feature set. Model performances based on the evaluation set were  
253 obtained for each truncated model and were evaluated as a function of the number of top features (k)  
254 included in each truncated model to determine the optimal feature set.

## 255 2.7 Statistical analyses

256 To statistically examine whether the models' performances are significantly above chance level, we  
257 performed a random permutation test where labels in the training data (e.g., HC vs. Patients) were  
258 shuffled 100 times and truncated models based on the best set of features were trained on these label-  
259 shuffled data using exactly the same approach as described above (Ojala and Garriga, 2009). The  
260 performances from the 100 models were used to construct the empirical null distribution against  
261 which the performance of the best truncated models based on the actual unshuffled data was then  
262 compared. This random permutation test procedure also helped us to determine whether overfitting  
263 occurred during training.

264 To evaluate differences in sum scores obtained from the top features between HC and patients, we  
265 used two sample t-tests on the sample means since the sum scores are quasi normally distributed.  
266 Effect sizes were measured using Cohen's d, which captures the shift in mean scaled by the data's  
267 standard deviation. Tests on the difference in AUC between the full model and the best truncated  
268 model were carried out via the Wilcoxon's rank-sum test.

269

## 270 3 Results

271 In total, we trained classifiers to distinguish HCs from the patient group as a whole based on 7 sets of  
272 features by either using each individual feature modality (self-reported instruments, sMRI, and fMRI)  
273 or combinations of 2 or 3 feature modalities (e.g., instruments+sMRI+fMRI). The classifiers'  
274 performances using each of the 7 feature sets for the HC vs. Patients classifier are reported in **Table**  
275 **2**. Overall, classifiers trained on feature sets involving phenotypical data from self-reported  
276 instruments (i.e., scales and scales + MRI feature sets) outperformed those only trained on MRI  
277 features (sMRI, fMRI, and sMRI+fMRI). For classifiers using features involving these instruments,  
278 the mean AUC ranged from 0.83 to 0.89 (mean accuracy: 0.77 – 0.91), whereas the mean AUC  
279 ranged from 0.56 to 0.59 (mean accuracy: 0.58 – 0.61) for MRI feature sets.

280 Next, to identify the optimal set of transdiagnostic features shared across the CNP patient population  
281 that are highly distinct from HC, we examined the performance measures from the best truncated  
282 classification models during sequential model selection (**Figure 1** and **Table 2**; see **Supplementary**  
283 **Fig. 1** for AUC as a function of input feature dimensions). Significantly improved performances were  
284 obtained from the best truncated classification models compared with the corresponding models  
285 using the full sets of features (all p's < 0.05, FDR corrected, as assessed by the rank-sum test; **Table**  
286 **2**). The AUCs from all feature sets were also significantly above chance level as assessed via the  
287 random permutation test (all p's < 0.01, FDR corrected; **Supplementary Fig. 2**). Additionally, the  
288 computational time for the importance guided sequential model selection method grew linearly as the  
289 number of features increased, which is highly efficient compared to the brute force feature selection  
290 procedure (exponential time complexity; **Supplementary Fig. 3**).

291 The truncated classification model involving data from the self-reported instruments alone had high  
292 performance of distinguishing patients from HCs with the mean AUC being 0.95 (accuracy: 0.88;  
293 sensitivity: 0.87; specificity: 0.88; **Figure 1**; **Table 2**). This truncated model selected 85 items as the  
294 most predictive features from the total of 578 items contained in the 13 self-reported instruments.  
295 Moreover, only 10 items were needed to achieve an AUC of 0.90 (accuracy: 0.81; sensitivity: 0.79;  
296 specificity: 0.84), suggesting that a concise scale can be constructed potentially for screening  
297 purposes. The model involving data from self-reported instruments performed better compared to

298 those using feature sets based solely on MRI (mean AUC ranging from 0.77 to 0.87; mean accuracy  
299 ranging from 0.71 to 0.85). Combining MRI features with data from instruments only slightly  
300 improved the model performance (mean AUC being 0.96 – 0.98) (**Figure 1; Table 2**). Taken  
301 together, this indicates that the phenotypical data captured by the 13 self-reported instruments contain  
302 a set of transdiagnostic features common across the patient populations studied while distinguishing  
303 them from the healthy controls. We hence focused on discussing these transdiagnostic phenotypical  
304 features below.

305 It should be noted that small yet systematic differences exist between patients and HCs in the CNP  
306 dataset despite the effort to fully counterbalance subjects' demographic information during  
307 recruiting. From the demographic information listed in **Table 1**, a statistical test on age showed that  
308 the median age for patients were significantly higher than HCs (Mann-Whitney's U test:  $p = 0.001$ ).  
309 The gender ratio on the other hand did not significantly differ between patients and HCs (Z-test on  
310 proportions:  $p = 0.14$ ). Patients had significantly lower years of education compared with HCs  
311 (Mann-Whitney's U test:  $p < 0.001$ ). The racial distribution also showed a significant difference  
312 between patients and HCs ( $\chi^2$ -test:  $p = 0.004$ ). To ensure that the results were not mainly driven by  
313 differences in demographics, we built classifiers based solely on these demographic variables. The  
314 mean test AUC on the evaluation set for the best model was 0.71 (SD = 0.06), which was  
315 substantially lower than the performance of both the full model and the best truncated model based  
316 on the self-reported instruments alone (mean AUCs being 0.83 and 0.95, respectively). Additionally,  
317 despite mixing the demographic variables with the self-reported instrument items slightly improved  
318 model performance compared to those obtained from instruments alone (mean AUC for truncated  
319 model using demographics and instruments: 0.98), the highest-ranking demographic variable ranked  
320 only 43<sup>rd</sup> among all instrument items and demographic features. Taken together, these results suggest  
321 that our models were unlikely to be mainly driven by demographic differences.

322 A simple sum score constructed by adding up an individual's responses to the 85 most predictive  
323 items (with item responses having negative model coefficients reversed) demonstrated high  
324 separability between healthy controls and patients (Cohen's  $d = 2.85$ ; test on the difference in sample  
325 mean:  $t = 10.27$ ,  $p < 0.001$ ; **Figure 2A**). The separability based on the top 10 most predictive items  
326 (corresponding AUC = 0.90) was also very high (Cohen's  $d = 2.16$ ; test on the difference in sample  
327 mean:  $t = 18.13$ ,  $p < 0.001$ ). The sum scores had higher separability than other known sum  
328 scores/sub-scores of the self-reported instruments (**Figure 2C & 2D; Supplementary Table 2**),  
329 indicating the items selected by the sequential model selection procedure do not adhere to known  
330 dimensional structures within the instruments. Calculating the sum score for each individual patient  
331 category showed that all 3 patient categories had elevated sum scores compared to healthy controls ( $t$   
332  $> 5.671$ ,  $p < 0.001$ ); yet, the difference between the patient categories was insignificant ( $t < 1.940$ ,  $p$   
333  $> 0.056$ ; **Figure 2B**). This suggests that the 85 items captured transdiagnostic phenotypic features  
334 shared across the patient groups as a whole rather than driven by a single patient category.

335 **Figure 3** illustrates the proportion of questionnaire items selected from each instrument that were  
336 included in transdiagnostic set of phenotypic features of the best truncated model (i.e. the one with  
337 the highest AUC). Items from all 13 instruments were selected to be among the top features by the  
338 classifiers. Overall, these instruments measure a wide range of phenotype and symptom domains  
339 encompassing personality traits, positive and negative affect (reward/anhedonia, fear, and anxiety),  
340 cognition (attention, response inhibition), sensory processing (perceptual disturbances), and social  
341 processing. While all items included among the set of transdiagnostic phenotypic features jointly  
342 formed a highly predictive set to distinguish patients from healthy controls, the Temperament and  
343 Character Inventory (TCI) contributed the largest proportion of items in the set of transdiagnostic



344 features. The proportion of TCI items selected among the 85 most predictive items (32.9%)  
345 significantly exceeded the proportion of all TCI items among all 578 items from the 13 instruments  
346 (24.0%;  $p = 0.04$  as assessed via the Z-test). The disproportionately high number of TCI items  
347 indicates that certain personality traits are strong predictors of shared psychopathology regarding  
348 SCZ, BD, and ADHD.

349 To better understand which features strongly predicted psychopathology, we focused on the top 20  
350 items that contributed the largest magnitude of model weights. We identified the specific  
351 behavioral/symptom phenotypes characterized by each item and then grouped the items accordingly.  
352 Among personality traits, the top transdiagnostic phenotypes included neuroticism, extraversion, and  
353 impulsivity (**Figure 4A**); whereas the top symptom domains consisted of mood dysregulation,  
354 inattention, hyperactivity/agitation, and social anhedonia and apathy. In addition, the importance of  
355 religion was also a shared feature across patients (**Figure 4A**; see **Supplementary Table 4** for item  
356 grouping). We next compared the most predictive transdiagnostic features with those most predictive  
357 of a single patient category from healthy controls to identify category-specific differences (**Figure**  
358 **4B-D**; see **Supplementary Table 3 and Supplementary Fig. 4** for classification results between HC  
359 and each patient category). SCZ patients exhibited additional features including perceptual  
360 aberration, physical anhedonia, and psychological distress that are not among the top transdiagnostic  
361 features. On the other hand, extraversion, impulsivity, inattention, and religion which were present in  
362 the transdiagnostic features set were not among the most predictive features for SCZ (**Figure 4B** and  
363 **Supplementary Table 5**). By contrast, transdiagnostic features overlapped with BD patient-specific  
364 features. Nonetheless, BD patients exhibited additional features of increased energy, psychological  
365 distress and physical anhedonia; yet psychomotor agitation and neuroticism contributed little  
366 predictive value (**Figure 4C, Supplementary Table 6**). ADHD patients were effectively classified  
367 by additional features such as indecision and physical anhedonia, with little predictive contribution  
368 from apathy, neuroticism, and religion (**Figure 4D, Supplementary Table 7**).

369

## 370 4 Discussion

371 In this study, using self-reported instruments provided in the CNP dataset, we generated predictive  
372 models to identify a set of transdiagnostic phenotypic features that were shared across SCZ, BD, and  
373 ADHD. These models were quantified for performance (e.g. accuracy, sensitivity and specificity) and  
374 were interpretable along dimensions of personality traits and symptom domains. We found the set of  
375 85 items is highly predictive of the patient group as a whole from HCs. To our surprise, a compact  
376 model of only 10 items is sufficient to achieve a performance AUC value of 0.90. Further, we  
377 demonstrated that a simple sum score can be calculated to enable high separability between patients  
378 and HCs. Our importance-guided sequential model selection approach revealed which phenotypical  
379 features were shared across transdiagnostic patient groups. Within each patient population, we also  
380 show which abnormal psychopathological personality traits and symptom domains deviated from the  
381 transdiagnostic classifier. Importantly, many of these features are consistent with established clinical  
382 intuition. Taken together, this study offers new perspectives on the shared psychopathology across  
383 SCZ, BD, and ADHD and underscores the potential of creating a short transdiagnostic screening  
384 scale based on the selected items.

385 The application of machine learning to systematically search for consistent patterns in clinical data  
386 across disease categories defined in DSM is an emerging trend in the field of computational  
387 psychiatry (Bzdok and Meyer-Lindenberg, 2017). Nonetheless, our approach to identifying

388 transdiagnostic features in psychiatric disorders differs both conceptually and methodologically from  
389 previous studies. Numerous investigators have focused on patient subtyping within a given disorder  
390 (Rhebergen et al., 2011; Lamers et al., 2012; van Loo et al., 2012, 2014; Georgiades et al., 2013;  
391 Brodersen et al., 2014; Doshi-Velez et al., 2014; Lewandowski et al., 2014; van Hulst et al., 2014;  
392 Veatch et al., 2014; Costa Dias et al., 2015; Geisler et al., 2015; Sun et al., 2015; Clementz et al.,  
393 2016; Drysdale et al., 2016; Mostert et al., 2018) or have mined transdiagnostic symptom dimensions  
394 underlying various psychiatric disorders (Grisanzio et al., 2017; Elliott et al., 2018; Xia et al., 2018a,  
395 b). Among studies examining the transdiagnostic symptom dimensions, most adopted an  
396 unsupervised machine learning predictive framework. However, the differences in distance/similarity  
397 metrics used, coupled with the lack of ground truth in the unsupervised machine learning algorithms  
398 used to detect the transdiagnostic structure, make it difficult to validate the clinical utility of the  
399 identified features. We designed our study to overcome these limitations. To our best knowledge, our  
400 study is the first to use feature importance to guide forward model selection under a supervised  
401 machine learning framework to identify transdiagnostic psychopathological features across multiple  
402 DSM categories. The high performance of our truncated models selected via the model selection  
403 approach demonstrate the potential clinical utility of the identified transdiagnostic features.

404 Though we built models with different modalities as inputs (e.g. personality traits, symptoms and  
405 neuroimaging), we found high performance models could be obtained without significant  
406 contribution of the imaging modalities. This finding contrasts with what would be predicted from the  
407 published literature. For example, a recent meta-analysis of studies on psychiatric disorders involving  
408 structural magnetic resonance imaging (sMRI) identified shared abnormalities in certain brain  
409 regions underlying common psychiatric disorders (Goodkind et al., 2015). In addition, studies using  
410 functional MRI (fMRI) found altered functional connectivity patterns shared across multiple  
411 categories of disorders such as SCZ, BD, and major depressive disorder (MDD) (Buckholtz and  
412 Meyer-Lindenberg, 2012; Wei et al., 2018). Similarly, another recent study focusing on MDD, post-  
413 traumatic stress disorder, and panic disorder identified 6 distinct subtypes based on 3 orthogonal  
414 symptom dimensions shared across the DSM diagnoses and their corresponding biomarkers in  
415 electroencephalogram (EEG) beta activity (Grisanzio et al., 2017). Although these studies did not  
416 systematically compare the predictability in each data modality, it is possible that the sample size in  
417 CNP or other methodological differences (e.g., parcellation used during sMRI and fMRI feature  
418 extraction) limited the weighted importance of structural or functional measures in our models.

419 A broad set of behavioral phenotypic features from the self-report instruments were identified by our  
420 sequential model selection procedure to be shared across the three patient groups. The phenotypes are  
421 distributed across all 13 self-reported instruments and covers symptom domains encompassing  
422 personality and traits, positive and negative affect, cognition, sensory and social processing. It should  
423 be noted that these 13 self-reported instruments are not designed to yield diagnoses. Therefore, a set  
424 of phenotypic features that can be identified algorithmically and used to distinguish patients from  
425 HCs with an accuracy level close to a clinician's performance demonstrates the potential clinical  
426 utility of the phenotypic features and the sequential model selection approach. For the top 20 most  
427 predictive features, mood dysregulation, impulsivity, inattention, neuroticism, social anhedonia and  
428 apathy weighted prominently in the transdiagnostic model. This high level of shared symptom  
429 domains across SCZ, BD, and ADHD is in line with recent genetic studies reporting significantly  
430 correlated risk factors for heritability among these three disorders (Larsson et al., 2013; The  
431 Brainstorm Consortium et al., 2017; Bipolar Disorder and Schizophrenia Working Group of the  
432 Psychiatric Genomics Consortium et al., 2018). For SCZ and BD, previous studies have identified  
433 shared features both in terms of symptoms and the underlying psychopathology and biology  
434 (Pearlson, 2015). Similarly, studies have identified shared symptoms and biology between SCZ and

435 ADHD (Peralta et al., 2011; Park et al., 2018) and have found high levels of comorbidity between  
436 BD and ADHD along with the shared features between the two disorders (Nierenberg et al., 2005;  
437 Klassen et al., 2010; van Hulzen et al., 2017; Wang et al., 2017). Despite these prior studies, the three  
438 diagnostic categories have not been considered together in a single study. Consistent with the  
439 findings reported in these studies, our study provides an important data-driven confirmation on the  
440 shared behavioral and symptoms features across the three disease categories.

441 Since the TCI is less commonly used in clinical practice and historically a greater emphasis has been  
442 placed on symptoms than personality traits, we were surprised by the finding that the TCI contributed  
443 the largest proportion of questions among the set of 85 most predictive items determined by the  
444 transdiagnostic classifier. Prior studies have found that the personality traits and characters defined in  
445 the TCI are associated with various mood disorders (Cloninger et al., 1998; Grucza et al., 2003).  
446 Specifically, for disorders in the CNP dataset, studies have found positive association between  
447 personality dimensions characterized in TCI and overall ADHD symptom (Lynn et al., 2005;  
448 Anckarsäter et al., 2006) as well as subtypes of ADHD (Salgado et al., 2009). For SCZ, studies have  
449 identified links between positive and negative symptom dimensions and TCI factors (Guillem et al.,  
450 2002; Hori et al., 2008). Among BD patients, (Hajirezaei et al., 2017) identified personality profiles  
451 that are distinct from healthy controls and these profiles were further found to be shared with MDD.  
452 Since these studies associated disease symptoms solely with the known factor scores in the TCI, the  
453 contribution of the nuanced personality profiles captured in individual items in the TCI could not be  
454 determined. In the current study, the fact that we identified items in the TCI that corresponded to  
455 shared symptoms such as apathy, anhedonia, and distress extends prior literature and is consistent  
456 with studies documenting the relationship between TCI factor scores and symptoms such as  
457 anhedonia (Martinotti et al., 2008), as well as depression and anxiety (Jylhä and Isometsä, 2006).  
458 Additionally, prior studies only examined TCI's association with symptoms without simultaneously  
459 including other instruments as covariates in the model. Such an approach cannot evaluate the relative  
460 importance of the personality traits in TCI against the broader set of phenotypical features defined in  
461 other instruments. In this regard, our study established the usefulness of personality traits as a set of  
462 reliable transdiagnostic features among all features defined in the self-reported instruments in the  
463 CNP data.

464 The sum score of the 85 most predictive transdiagnostic items achieved much higher separability  
465 between HC and patients than known sub-scores and sum scores in the instruments that were  
466 specifically designed to assess diagnosis-specific symptom domains. This is true even for the subset  
467 of top 10 most predictive transdiagnostic items, which indicates that the shared phenotypic features  
468 across patient groups do not fully adhere to known dimensional structures in the instruments. Thus,  
469 using the total score and/or the sub-scores according to pre-defined subscales of a given instrument  
470 cannot identify the optimal set of transdiagnostic features. One explanation for this phenomenon is  
471 that because the patients share a broad range of phenotypic features, the pre-defined subscales and  
472 sum scores become insufficient in capturing the full dimensional structure since most of the  
473 instruments are designed to measure a limited set of constructs targeting a specific patient population  
474 (Avila et al., 2015). This further demonstrates the advantage of our importance-guided sequential  
475 model selection approach in identifying potentially clinically relevant transdiagnostic features across  
476 a large set of instruments.

477 While patients shared a broad set of phenotypic features, our results showed deviations from this  
478 transdiagnostic structure within the most predictive features for each patient group. These differences  
479 may in particular reflect clustered personality traits and symptom domains that are most unique for  
480 each patient population. For SCZ, the unique features of perceptual aberration and psychological

481 distress, along with other features that are consistent with the transdiagnostic structure, largely  
482 conform to the positive and negative symptom dimensions associative with SCZ patients. For BD,  
483 the unique features of increased energy, physical anhedonia, and psychological distress serve to  
484 shape the symptom structure along the manic and depressive dimensions. For ADHD, the increased  
485 representation in inattention, hyperactivity, and impulsivity is consistent with the overall  
486 symptomatology of ADHD patients. Overall, the concurrent existence of shared and category-  
487 specific phenotypic features across the CNP patient groups is consistent with recent studies reporting  
488 both shared and distinct properties in functional brain networks (Grisanzio et al., 2017; Xia et al.,  
489 2018a, b) and genetic neuropathology (The Brainstorm Consortium et al., 2017; Gandal et al., 2018)  
490 across major psychiatric disorders. Our results raise the possibility of exploring the relationship  
491 between the predictive phenotypic features and the underlying genetics of the individuals or groups  
492 that present with these features.

493 In conclusion, we identified a set of transdiagnostic phenotypic features shared across SCZ, BD, and  
494 ADHD. This set of features distinguished the patient group from HC with high accuracy and a  
495 compact transdiagnostic screening scale can be derived from the corresponding top 10 most  
496 predictive questionnaire items. The feature importance guided sequential model selection provides a  
497 data-driven method to identify shared features under a supervised machine learning framework, in  
498 which the performance of the identified feature sets is evaluated on unseen data. This is an advantage  
499 over unsupervised machine learning methods. Moreover, the importance guided sequential model  
500 selection can be generalized to identify clinically-useful transdiagnostic features across categories  
501 defined in DSM-5 and ICD-10, or alternatively to identify the neural correlates of symptom severity  
502 across psychiatric disorders (Melle et al., 2018). It should be noted that the medication status in the  
503 CNP dataset is not controlled. This suggests that although reliable transdiagnostic features could be  
504 identified across patient groups, the underlying cause of the observed symptom structure could  
505 potentially be confounded by the uncontrolled medication and symptom status. Future studies should  
506 further validate the transdiagnostic features identified in this study on other datasets with similar  
507 patient populations and with better controlled medication status. Including these additional datasets  
508 as out-of-sample validations can demonstrate the generalizability of the current results and  
509 methodology to the wider population. Additionally, because the phenotypic features largely reflected  
510 behaviors and symptoms through self-reports, the high performance of our models based on these  
511 features may be reflecting the close mapping between the identified features and symptom-based  
512 diagnostic criteria in DSM. Nevertheless, our findings represent an important step in the ongoing  
513 effort to characterize clinically useful transdiagnostic phenotypes. Future studies could potentially  
514 investigate the underlying brain circuits associated with these clinically-relevant phenotypic features.

515

## 516 **5 Conflict of Interest**

517 The authors are employees of BlackThorn Therapeutics, Inc, and are compensated financially by  
518 BlackThorn Therapeutics, Inc.

519

## 520 **6 Author Contributions**

521 YL, MM, HG, WM, PA designed the study; YL, MM, HG, MK, ARM, AM performed the analysis;  
522 YL, MM, HG, MK, ARM, WM, PA wrote the manuscript.

523

## 524 **7 Funding**

525 This work is funded by BlackThorn Therapeutics, Inc.

526

## 527 **8 Acknowledgments**

528 The authors would like to thank Clark Gao, Lori Jean Van Orden, Martine Meyer, and Simone  
529 Krupka for their help and discussions in shaping this work.

530

## 531 **9 References**

532 Abrams R., & Taylor M. (1981). Importance of schizophrenic symptoms in the diagnosis of mania.  
533 *Am J Psychiatry*, 138(5):658–661.

534 American Psychiatric Association. (2000). *Diagnostic and statistical manual of mental disorders*. (4th  
535 ed.). Washington, DC: American Psychiatric Press Inc.

536 Anckarsäter H., Stahlberg O., Larson T., Hakansson C., Jutblad S.B., Niklasson L., Nydén A., Wentz  
537 E., Westergren S., Cloninger C.R., Gillberg C., & Rastam M. (2006). The Impact of ADHD and  
538 autism spectrum disorders on temperament, character, and personality development. *Am J*  
539 *Psychiatry*, 163(7):1239–1244.

540 Avila M., Stinson J., Kiss A., Brandão L.R., Uleryk E., & Feldman B.M. (2015). A critical review of  
541 scoring options for clinical measurement tools. *BMC Res Notes* 8:612.

542 Bipolar Disorder and Schizophrenia Working Group of the Psychiatric Genomics Consortium.  
543 (2018). Genomic Dissection of Bipolar Disorder and Schizophrenia, Including 28 Subphenotypes.  
544 *Cell* 173(7):1705-1715.e16.

545 Brodersen K.H., Deserno L., Schlagenhaut F., Lin Z., Penny W.D., Buhmann J.M., & Stephan K.E.  
546 (2014). Dissecting psychiatric spectrum disorders by generative embedding. *Neuroimage Clin* 4:98–  
547 111.

548 Buckholtz J.W., & Meyer-Lindenberg A. (2012). Psychopathology and the human connectome:  
549 toward a transdiagnostic model of risk for mental illness. *Neuron* 74(6):990–1004.

550 Bzdok D., & Meyer-Lindenberg A. (2017). Machine Learning for Precision Psychiatry:  
551 Opportunities and Challenges. *Biol Psychiatry Cogn Neurosci Neuroimaging* 3(3):223-230.

552 Clementz B.A., Sweeney J.A., Hamm JP, Ivleva EI, Ethridge LE, Pearlson GD, Keshavan MS, &  
553 Tamminga CA (2016) Identification of Distinct Psychosis Biotypes Using Brain-Based Biomarkers.  
554 *Am J Psychiatry* 173(4):373–384.

555 Cloninger CR, Bayon C, & Svrakic DM (1998) Measurement of temperament and character in mood  
556 disorders: a model of fundamental states as personality types. *J Affect Disorder* 51(1):21–32.

557 Coryell W, Leon AC, Turvey C, Akiskal HS, Mueller T, & Endicott J (2001) The significance of  
558 psychotic features in manic episodes: a report from the NIMH collaborative study. *J Affect Disord*  
559 67(1-3):79–88.

- 560 Cross-Disorder Group of the Psychiatric Genomics Consortium (2013) Identification of risk loci with  
561 shared effects on five major psychiatric disorders: a genome-wide analysis. *Lancet* 381(9875):1371–  
562 1379.
- 563 Desikan RS, Ségonne F, Fischl B, Quinn BT, Dickerson BC, Blacker D, Buckner RL, Dale AM,  
564 Maguire PR, Hyman BT, Albert MS, & Killiany RJ (2006) An automated labeling system for  
565 subdividing the human cerebral cortex on MRI scans into gyral based regions of interest.  
566 *Neuroimage* 31(3):968–980.
- 567 Costa Dias TG, Iyer SP, Carpenter SD, Cary RP, Wilson VB, Mitchell SH, Nigg JT, & Fair DA  
568 (2015) Characterizing heterogeneity in children with and without ADHD based on reward system  
569 connectivity. *Dev Cogn Neurosci* 11:155–174.
- 570 Doshi-Velez F, Ge Y, & Kohane I (2014) Comorbidity clusters in autism spectrum disorders: an  
571 electronic health record time-series analysis. *Pediatrics* 133(1):e54–63.
- 572 Drysdale AT, Grosenick L, Downar J, Dunlop K, Mansouri F, Meng Y, ... Liston C (2016) Resting-  
573 state connectivity biomarkers define neurophysiological subtypes of depression. *Nat Med* 23(1):28-  
574 38.
- 575 Elliott ML, Romer AL, Knodt AR, & Hariri AR (2018) A Connectome-Wide Functional Signature of  
576 Transdiagnostic Risk for Mental Illness. *Biol Psychiat* 84(6):452-459.
- 577 First, M. B., Spitzer, R. L., Gibbon, M. & Williams, J. B.W. Structured Clinical Interview for DSM-  
578 IV-TR Axis I Disorders, Research Version, Patient Edition. (SCID-I/P) (2002).
- 579 Fischl B, Liu A, Dale AM (2001) Automated Manifold Surgery: Constructing Geometrically  
580 Accurate and Topologically Correct Models of the Human Cerebral Cortex. *IEEE Trans Med*  
581 *Imaging* 20:70.
- 582 Fischl B, Salat DH, Busa E, Albert M, Dieterich M, Haselgrove C, van der Kouwe A, Killiany R,  
583 Kennedy D, Klaveness S, Montillo A, Makris N, Rosen B, Dale AM (2002) Whole Brain  
584 Segmentation Automated Labeling of Neuroanatomical Structures in the Human Brain. *Neuron*  
585 33:341–355.
- 586 Gandal MJ, Haney JR, Parikhshak NN, Leppa V, Ramaswami G, Hartl C, Schork AJ, Appadurai V,  
587 Buil A, Werge TM, Liu C, White KP, Consortium C, Consortium P, Group iPSYCH-B, Horvath S,  
588 Geschwind DH (2018) Shared molecular neuropathology across major psychiatric disorders parallels  
589 polygenic overlap. *Science* 359:693–697.
- 590 Geisler D, Walton E, Naylor M, Roessner V, Lim KO, Schulz CS, Gollub RL, Calhoun VD,  
591 Sponheim SR, Ehrlich S (2015) Brain structure and function correlates of cognitive subtypes in  
592 schizophrenia. *Psychiatry Res Neuroimaging* 234:74–83.
- 593 Georgiades S, Szatmari P, Boyle M, Hanna S, Duku E, Zwaigenbaum L, Bryson S, Fombonne E,  
594 Volden J, Mirenda P, Smith I, Roberts W, Vaillancourt T, Waddell C, Bennett T, Thompson A, in  
595 Team P (2013) Investigating phenotypic heterogeneity in children with autism spectrum disorder: a  
596 factor mixture modeling approach. *J Child Psychol Psych* 54:206–215.
- 597 Gheiratmand M, Rish I, Cecchi GA, Brown MR, Greiner R, Polosecki PI, Bashivan P, Greenshaw  
598 AJ, Ramasubbu R, Dursun SM (2017) Learning stable and predictive network-based patterns of  
599 schizophrenia and its clinical symptoms. *Npj Schizophrenia* 3:22.
- 600 Goodkind M, Eickhoff SB, Oathes DJ, Jiang Y, Chang A, Jones-Hagata LB, Ortega BN, Zaiko YV,  
601 Roach EL, Korgaonkar MS, Grieve SM, Galatzer-Levy I, Fox PT, Etkin A (2015) Identification of a  
602 Common Neurobiological Substrate for Mental Illness. *JAMA Psychiatry* 72:305–315.

- 603 Grisanzio KA, Goldstein-Piekarski AN, Wang M, Ahmed AP, Samara Z, Williams LM (2017)  
604 Transdiagnostic Symptom Clusters and Associations With Brain, Behavior, and Daily Function in  
605 Mood, Anxiety, and Trauma Disorders. *JAMA Psychiatry* 75(2):201-209.
- 606 Grucza RA, Przybeck TR, Spitznagel EL, Cloninger CR (2003) Personality and depressive  
607 symptoms: a multi-dimensional analysis. *J Affect Disorders* 74:123–130.
- 608 Guillem F, Bicu M, Semkovska M, Debruille JB (2002) The dimensional symptom structure of  
609 schizophrenia and its association with temperament and character. *Schizophr Res* 56:137–147.
- 610 Hajirezaei S, Mohammadi A, Soleimani M, Rahiminezhad F, Mohammadi M, Cloninger RC (2017)  
611 Comparing the Profile of Temperament and Character Dimensions in Patients with Major Depressive  
612 Disorder and Bipolar Mood Disorder with a Control Group. *Iranian J Psychiatry* 12:147–153.
- 613 Hamshere ML, Stergiakouli E, Langley K, Martin J, Holmans P, Kent L, Owen MJ, Gill M, Thapar  
614 A, O'Donovan M, Craddock N (2013) Shared polygenic contribution between childhood attention-  
615 deficit hyperactivity disorder and adult schizophrenia. *Br J Psychiatry* 203:107–111.
- 616 Hori H, Noguchi H, Hashimoto R, Nakabayashi T, Saitoh O, Murray RM, Okabe S, Kunugi H (2008)  
617 Personality in schizophrenia assessed with the Temperament and Character Inventory (TCI). *Psychiat*  
618 *Res* 160:175–183.
- 619 Jo H, Saad ZS, Simmons KW, Milbury LA, Cox RW (2010) Mapping sources of correlation in  
620 resting state fMRI, with artifact detection and removal. *Neuroimage* 52:571–582.
- 621 Jylhä P, Isometsä E (2006) Temperament, character and symptoms of anxiety and depression in the  
622 general population. *Eur Psychiat* 21(6):389-395.
- 623 Kaufman, J., Birmaher, B., Brent, D. A., Ryan, N. D. & Rao, U. (2000). K-SADS-PL. *J Am Acad*  
624 *Child Adolesc Psychiatry* 39(10): 1208.
- 625 Keck PE, McElroy SL, Havens J, Altshuler LL, Nolen WA, Frye MA, Suppes T, Denicoff KD,  
626 Kupka R, Leverich GS, Rush AJ, Post RM (2003) Psychosis in bipolar disorder: phenomenology and  
627 impact on morbidity and course of illness. *Compr Psychiat* 44:263–269.
- 628 Kessler R, Gruber M, Hettema J, Hwang I, Sampson N, Yonkers K (2007) Co-morbid major  
629 depression and generalized anxiety disorders in the National Comorbidity Survey follow-up. *Psychol*  
630 *Med* 38:365–374.
- 631 Kessler RC, Demler O, Frank RG, Olfson M, Pincus H, Walters EE, Wang P, Wells KB, Zaslavsky  
632 AM (2005) Prevalence and Treatment of Mental Disorders, 1990 to 2003. *New Engl J Medicine*  
633 352:2515–2523.
- 634 Klassen LJ, Katzman MA, Chokka P (2010) Adult ADHD and its comorbidities, with a focus on  
635 bipolar disorder. *J Affect Disorders* 124:1–8.
- 636 Krueger RF, Markon KE (2006) Reinterpreting Comorbidity: A Model-Based Approach to  
637 Understanding and Classifying Psychopathology. *Annu Rev Clin Psycho* 2:111–133.
- 638 Krueger RF, Markon KE (2011) A Dimensional-Spectrum Model of Psychopathology: Progress and  
639 Opportunities. *Arch Gen Psychiat* 68:10–11.
- 640 Lamers F, Burstein M, He J, Avenevoli S, Angst J, Merikangas KR (2012) Structure of major  
641 depressive disorder in adolescents and adults in the US general population. *Br J Psychiatry* 201:143–  
642 150.

- 643 Larsson H, Rydén E, Boman M, Långström N, Lichtenstein P, Landén M (2013) Risk of bipolar  
644 disorder and schizophrenia in relatives of people with attention-deficit hyperactivity disorder. *Br J*  
645 *Psychiatry* 203:103–106.
- 646 Lewandowski K, Sperry S, Cohen B, Öngür D (2014) Cognitive variability in psychotic disorders: a  
647 cross-diagnostic cluster analysis. *Psychol Med* 44:3239–3248.
- 648 Lotan A, Michaela Fenckova , Janita Bralten, Aet Alittoa, Luanna Dixson, Robert W. Williams and  
649 Monique van der Voet (2014) Neuroinformatic analyses of common and distinct genetic components  
650 associated with major neuropsychiatric disorders. *Frontiers in Neuroscience* 8: 1-15.
- 651 Lynn DE, Lubke G, Yang M, McCracken JT, McGough JJ, Ishii J, Loo SK, Nelson SF, Smalley SL  
652 (2005) Temperament and Character Profiles and the Dopamine D4 Receptor Gene in ADHD. *Am J*  
653 *Psychiat* 162:906–913.
- 654 Markon K (2009) Modeling psychopathology structure: a symptom-level analysis of Axis I and II  
655 disorders. *Psychol Med* 40:273–288.
- 656 Martinotti G, Cloninger CR, Janiri L (2009) Temperament and character inventory dimensions and  
657 anhedonia in detoxified substance-dependent subjects. *Am J Drug Alcohol Abus* 34(2):177-183.
- 658 Mellem SM, Liu Y, Gonzalez H, Kollada M, Martin WJ, Ahammad P (2018) Machine learning  
659 models identify multimodal measurements highly predictive of transdiagnostic symptom severity for  
660 mood, anhedonia, and anxiety. *BioRxiv*, doi: <https://doi.org/10.1101/414037>
- 661 Mostert JC, Hoogman M, Onnink MA, van Rooij D, von Rhein D, van Hulzen KJ, Dammers J, Kan  
662 CC, Buitelaar JK, Norris DG, Franke B (2018) Similar Subgroups Based on Cognitive Performance  
663 Parse Heterogeneity in Adults with ADHD and Healthy Controls. *J Atten Disord* 22:281–292.
- 664 Nierenberg AA, Miyahara S, Spencer T, Wisniewski SR, Otto MW, Simon N, Pollack MH, Ostacher  
665 MJ, Yan L, Siegel R, Sachs GS, Investigators S-B (2005) Clinical and Diagnostic Implications of  
666 Lifetime Attention-Deficit/Hyperactivity Disorder Comorbidity in Adults with Bipolar Disorder:  
667 Data from the First 1000 STEP-BD Participants. *Biol Psychiat* 57:1467–1473.
- 668 Ojala M, Garriga GC (2009) Permutation Tests for Studying Classifier Performance. 2009 Ninth Ieee  
669 *Int Conf Data Min*:908–913.
- 670 Pacheco A, Barguil M, Contreras J, Montero P, Dassori A, Escamilla MA, Raventós H (2010) Social  
671 and clinical comparison between schizophrenia and bipolar disorder type I with psychosis in Costa  
672 Rica. *Soc Psych Psych Epid* 45:675–680.
- 673 Park MM, Raznahan A, Shaw P, Gogtay N, Lerch JP, Chakravarty MM (2018) Neuroanatomical  
674 phenotypes in mental illness: identifying convergent and divergent cortical phenotypes across autism,  
675 ADHD and schizophrenia. *J Psychiatry Neurosci Jpn* 43:201–212.
- 676 Pearlson GD (2015) Etiologic, Phenomenologic, and Endophenotypic Overlap of Schizophrenia and  
677 Bipolar Disorder. *Annu Rev Clin Psycho* 11:1–31.
- 678 Peralta V, de Jalón E, Campos MS, Zandío M, Sanchez-Torres A, Cuesta MJ (2011) The meaning of  
679 childhood attention-deficit hyperactivity symptoms in patients with a first-episode of schizophrenia-  
680 spectrum psychosis. *Schizophr Res* 126:28–35.
- 681 Poldrack RA, Congdon E, Triplett W, Gorgolewski KJ, Karlsgodt KH, Mumford JA, Sabb FW,  
682 Freimer NB, London ED, Cannon TD, Bilder RM (2016) A phenome-wide examination of neural  
683 and cognitive function. *Sci Data* 3:sdata2016110.



- 684 Pope HG, Lipinski JF (1978) Diagnosis in Schizophrenia and Manic-Depressive Illness: A  
685 Reassessment of the Specificity of “Schizophrenic” Symptoms in the Light of Current Research.  
686 *Arch Gen Psychiat* 35:811–828.
- 687 Power JD, Cohen AL, Nelson SM, Wig GS, Barnes K, Church JA, Vogel AC, Laumann TO, Miezin  
688 FM, Schlaggar BL, Petersen SE (2011) Functional Network Organization of the Human Brain.  
689 *Neuron* 72:665–678.
- 690 Purcell SM et al. (2009) Common polygenic variation contributes to risk of schizophrenia and  
691 bipolar disorder. *Nature* 460:748.
- 692 Rashid B, Damaraju E, Pearlson GD, Calhoun VD (2014) Dynamic connectivity states estimated  
693 from resting fMRI Identify differences among Schizophrenia, bipolar disorder, and healthy control  
694 subjects. *Front Hum Neurosci* 8:897.
- 695 Rhebergen D, Lamers F, Spijker J, de Graaf R, Beekman A, Penninx B (2011) Course trajectories of  
696 unipolar depressive disorders identified by latent class growth analysis. *Psychol Med* 42:1383–1396.
- 697 Ryali S, Chen T, Supekar K, Menon V (2012) Estimation of functional connectivity in fMRI data  
698 using stability selection-based sparse partial correlation with elastic net penalty. *Neuroimage*  
699 59:3852–3861.
- 700 Salgado CAI, Bau CHD, Grevet EH, Fischer AG, Victor MM, Kalil KLS, Sousa NO, Garcia CR,  
701 Belmonte-de-Abreu P (2009) Inattention and Hyperactivity Dimensions of ADHD Are Associated  
702 with Different Personality Profiles. *Psychopathology* 42:108–112.
- 703 Sha Z, Wager TD, Mechelli A, He Y (2018) Common Dysfunction of Large-Scale Neurocognitive  
704 Networks across Psychiatric Disorders. *Biol Psychiat*.
- 705 Sun H, Lui S, Yao L, Deng W, Xiao Y, Zhang W, Huang X, Hu J, Bi F, Li T, Sweeney JA, Gong Q  
706 (2015) Two Patterns of White Matter Abnormalities in Medication-Naive Patients with First-Episode  
707 Schizophrenia Revealed by Diffusion Tensor Imaging and Cluster Analysis. *JAMA Psychiatry*  
708 72:678–686.
- 709 The Brainstorm Consortium et al. (2017). Analysis of shared heritability in common disorders of the  
710 brain. *Science*, 360 (6395):eaap8757.
- 711 van Hulst B, de Zeeuw P, Durston S (2014) Distinct neuropsychological profiles within ADHD: a  
712 latent class analysis of cognitive control, reward sensitivity and timing. *Psychol Med* 45:735–745.
- 713 van Hulzen K, Scholz CJ, Franke B, Ripke S, Klein M, McQuillin A, Sonuga-Barke EJ, Group P,  
714 Kelsoe JR, Landén M, Andreassen OA, Group P, Lesch K-P, Weber H, Faraone SV, Arias-Vasquez  
715 A, Reif A (2017) Genetic Overlap Between Attention-Deficit/Hyperactivity Disorder and Bipolar  
716 Disorder: Evidence from Genome-wide Association Study Meta-analysis. *Biol Psychiat* 82:634–641.
- 717 van Loo HM et al. (2014) Major depressive disorder subtypes to predict long-term course. *Depress*  
718 *Anxiety* 31:765–777.
- 719 van Loo HM, de Jonge P, Romeijn J-W, Kessler RC, Schoevers RA (2012) Data-driven subtypes of  
720 major depressive disorder: a systematic review. *Bmc Med* 10:1–12.
- 721 Veatch O, Veenstra V, VanderWeele J, Potter M, Pericak Vance M, Haines J (2014) Genetically  
722 meaningful phenotypic subgroups in autism spectrum disorders. *Genes Brain Behav* 13:276–285.
- 723 Wang H, Jung Y-E, Chung S-K, Hong J, Kang N, Kim M-D, Bahk W-M (2017) Prevalence and  
724 correlates of bipolar spectrum disorder comorbid with ADHD features in nonclinical young adults. *J*  
725 *Affect Disorders* 207:175–180.

- 726 Wei Y, Chang M, Womer FY, Zhou Q, Yin Z, Wei S, Zhou Y, Jiang X, Yao X, Duan J, Xu K, Zuo  
727 X-N, Tang Y, Wang F (2018) Local functional connectivity alterations in schizophrenia, bipolar  
728 disorder, and major depressive disorder. *J Affect Disorders* 236:266–273.
- 729 Xia C.H. et al. (2018a) Linked dimensions of psychopathology and connectivity in functional brain  
730 networks. *Nat Commun* 9(1):3003.
- 731 Xia M, Womer FY, Chang M, Zhu Y, Zhou Q, Edmiston EK, Jiang X, Wei S, Duan J, Xu K, Tang  
732 Y, He Y, Wang F (2018b) Shared and Distinct Functional Architectures of Brain Networks Across  
733 Psychiatric Disorders. *Schizophr Bull.* doi: 10.1093/schbul/sby046
- 734 Zou H, Hastie T (2005) Regularization and variable selection via the elastic net. *J Royal Statistical*  
735 *Soc Ser B Statistical Methodol* 67:301–320.

**Table 1. Demographic Information\***

|                                   | <b>HC</b> | <b>SCZ</b> | <b>BD</b> | <b>ADHD</b> | <b>Total</b> |
|-----------------------------------|-----------|------------|-----------|-------------|--------------|
| No. of subjects                   | 130       | 50         | 49        | 43          | 272          |
| With complete phenotype data      | 130       | 50         | 48        | 43          | 271          |
| With sMRI data**                  | 98        | 30         | 44        | 34          | 206          |
| With fMRI data <sup>†</sup>       | 104       | 47         | 41        | 37          | 229          |
| <b>Age</b>                        |           |            |           |             |              |
| Mean age                          | 31.26     | 36.46      | 35.15     | 33.09       |              |
| SD age                            | 8.74      | 8.88       | 9.07      | 10.76       |              |
| Range age                         | 21-50     | 22-49      | 21-50     | 21-50       |              |
| <b>Gender</b>                     |           |            |           |             |              |
| No. of female subjects            | 62        | 12         | 21        | 22          |              |
| Percent female subjects           | 47.69%    | 24.00%     | 42.86%    | 51.16%      |              |
| <b>Race</b>                       |           |            |           |             |              |
| American Indian or Alaskan Native | 19.23%    | 22.00%     | 6.25%     | 0%          |              |
| Asian                             | 1.54%     | 2.00%      | 0%        | 2.33%       |              |
| Black/African American            | 0.77%     | 4.00%      | 2.08%     | 2.33%       |              |
| White                             | 78.46%    | 66.00%     | 77.08%    | 88.37%      |              |
| More than one race                | 0%        | 2.00%      | 14.58%    | 6.98%       |              |
| <b>Education</b>                  |           |            |           |             |              |
| No high school                    | 1.54%     | 18.00%     | 2.08%     | 0%          |              |
| High school                       | 12.31%    | 44.00%     | 29.17%    | 23.26%      |              |
| Some college                      | 20.77%    | 18.00%     | 25.00%    | 30.23%      |              |
| Associate's degree                | 7.69%     | 4.00%      | 6.25%     | 6.98%       |              |
| Bachelor's degree                 | 50.00%    | 10.00%     | 29.17%    | 32.56%      |              |
| Graduate degree                   | 6.92%     | 0%         | 4.17%     | 2.33%       |              |
| Other                             | 0.77%     | 4.00%      | 4.17%     | 4.65%       |              |

\* Demographic information is based on initial number of subjects

\*\* Excluding subjects with aliasing artifacts

<sup>†</sup> Excluding subjects with misaligned structural-function imaging data

**Table 2. Performances of the transdiagnostic models on each feature set\***

**Performance of the full model:**

|             | Scales     | sMRI       | fMRI       | s+fMRI     | Scales+sMRI | Scales+fMRI | Scales+s+fMRI |
|-------------|------------|------------|------------|------------|-------------|-------------|---------------|
| AUC         | 0.83(0.04) | 0.56(0.05) | 0.59(0.04) | 0.57(0.05) | 0.89(0.07)  | 0.86(0.06)  | 0.86(0.05)    |
| Accuracy    | 0.77(0.05) | 0.58(0.08) | 0.60(0.06) | 0.61(0.07) | 0.91(0.04)  | 0.87(0.05)  | 0.86(0.05)    |
| Sensitivity | 0.77(0.07) | 0.74(0.11) | 0.60(0.11) | 0.62(0.11) | 0.86(0.08)  | 0.82(0.12)  | 0.86(0.08)    |
| Specificity | 0.82(0.07) | 0.38(0.11) | 0.56(0.12) | 0.49(0.17) | 0.80(0.15)  | 0.61(0.30)  | 0.48(0.26)    |

**Performance of the best truncated model:**

|                 | Scales     | sMRI       | fMRI       | s+fMRI     | Scales+sMRI | Scales+fMRI | Scales+s+fMRI |
|-----------------|------------|------------|------------|------------|-------------|-------------|---------------|
| AUC             | 0.95(0.02) | 0.78(0.06) | 0.87(0.08) | 0.77(0.06) | 0.96(0.03)  | 0.98(0.02)  | 0.96(0.03)    |
| Accuracy        | 0.88(0.04) | 0.71(0.06) | 0.85(0.07) | 0.77(0.06) | 0.87(0.05)  | 0.92(0.04)  | 0.90(0.04)    |
| Sensitivity     | 0.87(0.08) | 0.81(0.09) | 0.86(0.09) | 0.77(0.08) | 0.93(0.07)  | 0.91(0.06)  | 0.94(0.05)    |
| Specificity     | 0.88(0.04) | 0.60(0.16) | 0.84(0.18) | 0.76(0.07) | 0.80(0.15)  | 0.92(0.04)  | 0.85(0.09)    |
| No. of features | 85         | 131        | 8192       | 16384      | 238         | 32          | 64            |

**Test on AUCs between the full and the truncated model\*\*:**

|                      | Scales  | sMRI    | fMRI    | s+fMRI  | Scales+sMRI | Scales+fMRI | Scales+s+fMRI |
|----------------------|---------|---------|---------|---------|-------------|-------------|---------------|
| Test statistic       | 100     | 100     | 100     | 99.5    | 82.5        | 100         | 95            |
| p-value <sup>†</sup> | < 0.001 | < 0.001 | < 0.001 | < 0.001 | 0.01537     | < 0.001     | < 0.001       |

\* The mean performance measures across 10 implementations are reported here with the standard deviation shown in parentheses

\*\* Wilcoxon's rank-sum test

† FDR-corrected

## Figure Legends

**Figure 1.** The performances of the best transdiagnostic models selected via the feature importance-guided sequential model selection procedure. **A)** The receiver operating characteristic (ROC) curve for the best truncated models based on each feature set. Area under the ROC curve (AUC) for each model is listed in the legend. **B)** Box plots showing the AUC of the best truncated model for each feature set measured across 10 implementations of sequential model selection procedure.

**Figure 2.** Distributions and effect sizes of the model's derived scores vs. the existing scale scores. **A)** Sum score calculated from the identified 85 most predictive items showing high separability in terms of Cohen's  $d$  between HC and Patients. **B)** All three patient categories showed elevated sum scores relative to HC ( $p < 0.001$ ). **C)** The 4 temperament sub-scores in TCI included in the CNP dataset showing only medium effect sizes between HC and Patients. **D)** Box plot showing significantly higher effect size from the identified 85 items (asterisk) compared to all predefined sum and subscores in self-reported instruments in CNP data. The asterisk represents the Cohen's  $d$  between HC and Patients from the top 85 items, whereas the box plot shows the effect sizes from all predefined sum and subscores (also see Supplementary Table 2).

**Figure 3.** The percentage of items from each of the 13 self-reported instruments among the set of 85 most predictive transdiagnostic items.

**Figure 4.** The grouping of items into specific phenotypic domains for the top 20 most predictive items from **A)** the HC vs. All Patients transdiagnostic model and **B) – D)** the 3 HC vs. a single patient category classifiers. The radius in the spider plots represents item counts.

**A**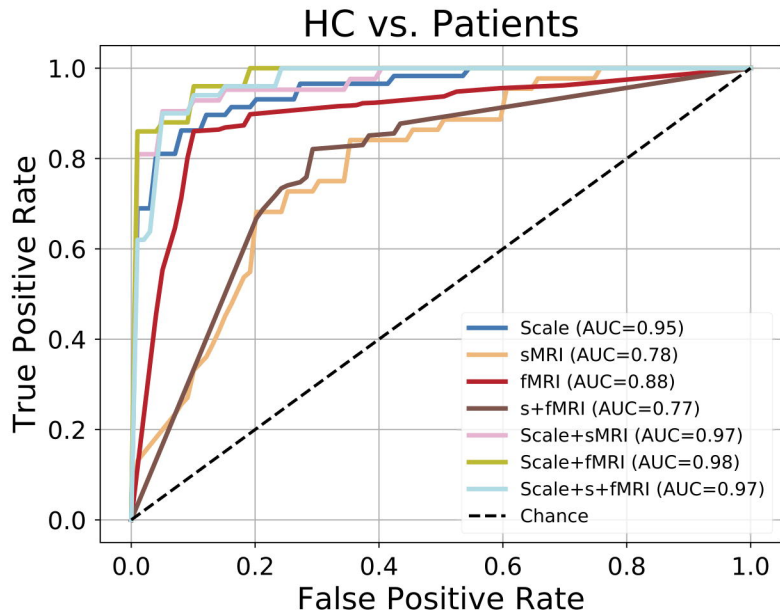**B**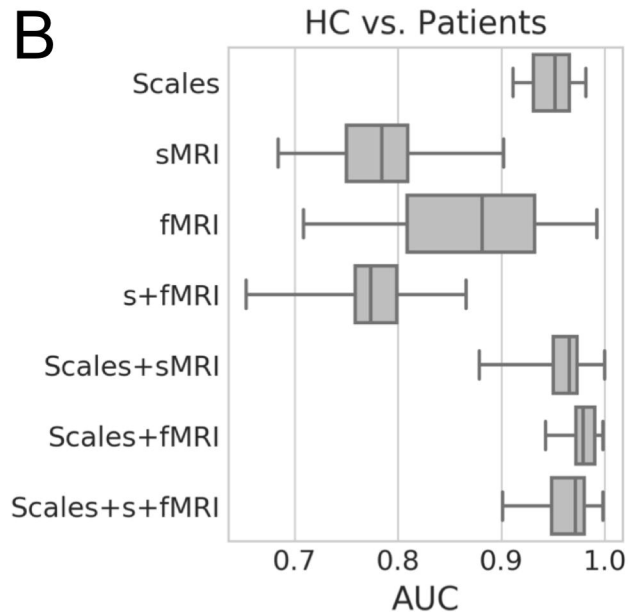

**A**

## Top 85 Questions

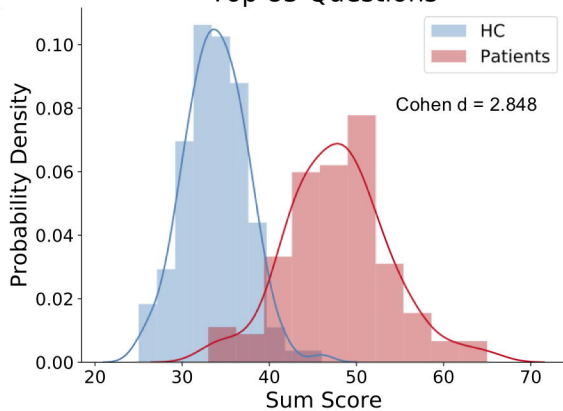**B**

## Top 85 Questions

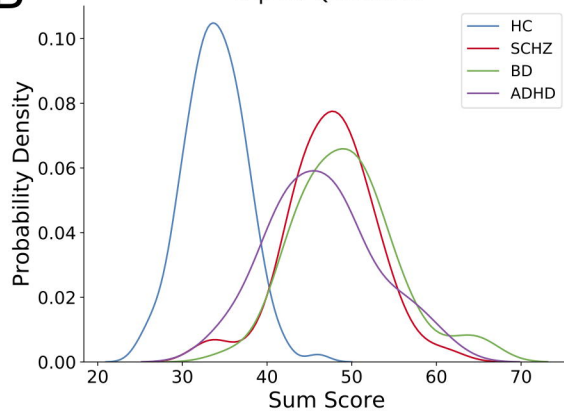**C**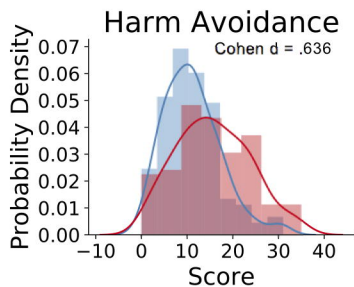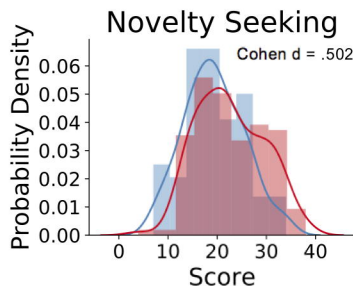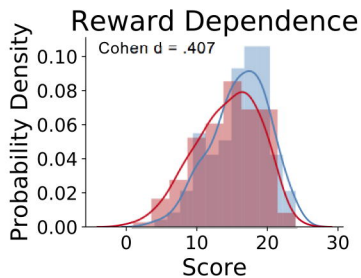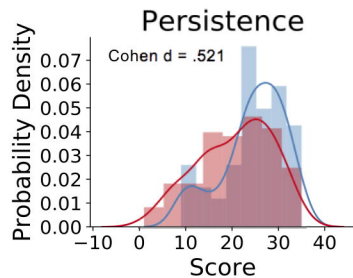**D**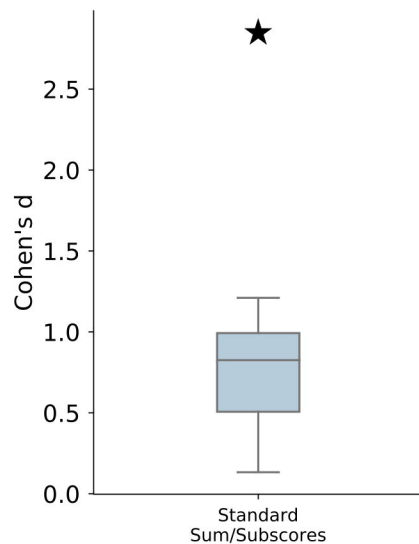

# Temperament & Character

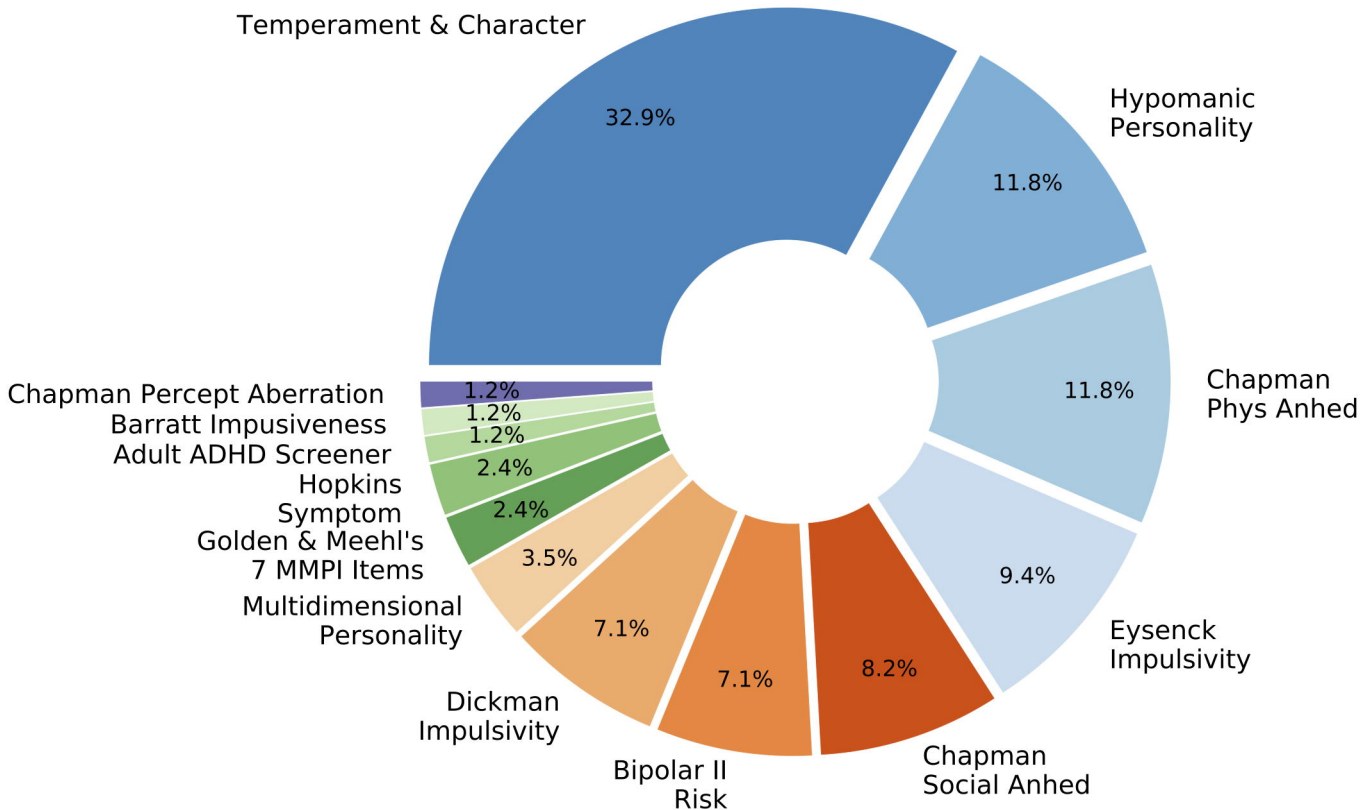



# A Transdiagnostic

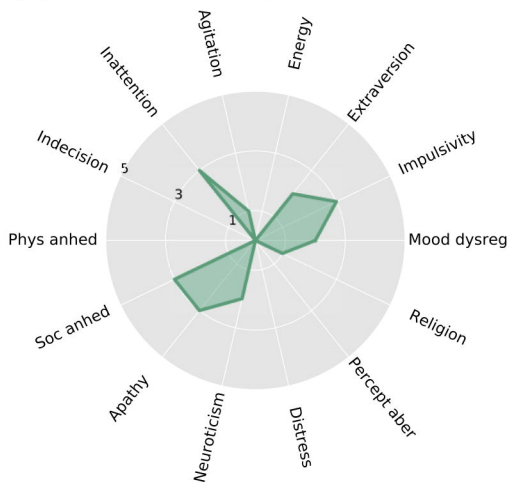

# B SCZ

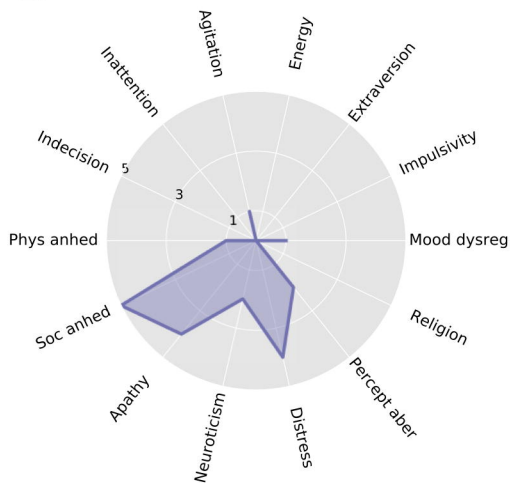

# C BD

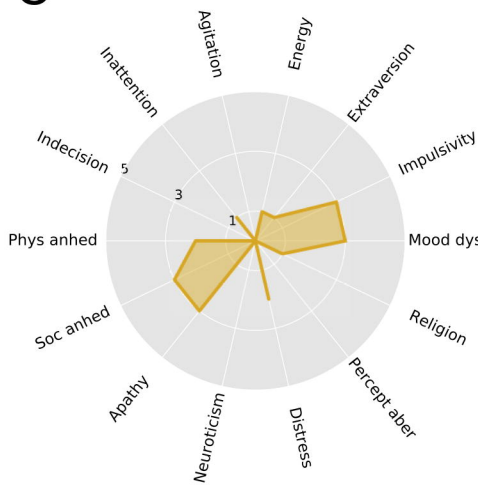

# D ADHD

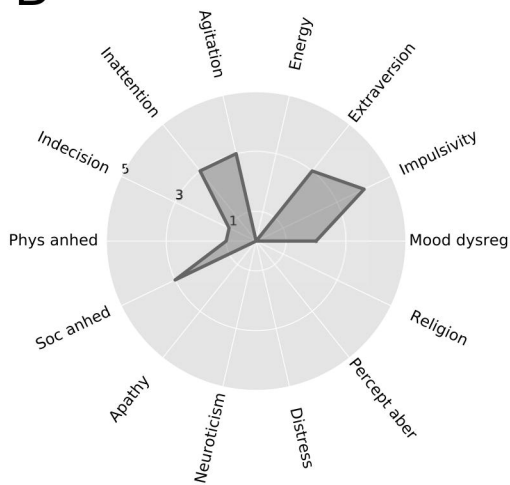

Source: https://www.biorxiv.org/content/10.1101/453951.full.pdf
